# Supplementary material for: Solvents and auxiliary ligands co-regulate three antiferromagnetic Co(ii) MOFs based on a semi-rigid carboxylate ligand
Source: Royal Society of Chemistry journal article supplement (doi:10.1039/c3dt53342e), 2014-01-01
Supplement: c3dt53342e.pdf [file c3dt53342e.pdf]

Supplementary Information

Solvents and auxiliary ligands co-regulate three antiferromagnetic

Co(II) MOFs based on a semi-rigid carboxylate ligand

Lin Cui, Guo-Ping Yang, Wei-Ping Wu, Hui-Hui Miao, Qi-Zhen Shi and Yao-Yu Wang\*

Table S1 Crystal data and structural parameters of CPs 1-3.

| Complex                                                                    | 1                                                                              | 2                                                                              | 3                                                                              |
|----------------------------------------------------------------------------|--------------------------------------------------------------------------------|--------------------------------------------------------------------------------|--------------------------------------------------------------------------------|
| <i>Empirical formula</i>                                                   | C <sub>66</sub> H <sub>52</sub> Co <sub>3</sub> N <sub>6</sub> O <sub>18</sub> | C <sub>36</sub> H <sub>50</sub> O <sub>16</sub> N <sub>5</sub> Co <sub>2</sub> | C <sub>78</sub> H <sub>62</sub> Co <sub>3</sub> N <sub>8</sub> O <sub>14</sub> |
| <i>Formula weight</i>                                                      | 1393.95                                                                        | 926.67                                                                         | 1512.15                                                                        |
| <i>Crystal System</i>                                                      | triclinic                                                                      | Triclinic                                                                      | Monoclinic                                                                     |
| <i>Space Group</i>                                                         | <i>P</i> $\bar{1}$                                                             | <i>P</i> $\bar{1}$                                                             | <i>P</i> 2/ <i>c</i>                                                           |
| <i>a/Å</i>                                                                 | 11.3568(12)                                                                    | 10.3914(7)                                                                     | 12.856(3)                                                                      |
| <i>b/Å</i>                                                                 | 12.0897(13)                                                                    | 12.7364(9)                                                                     | 11.081(3)                                                                      |
| <i>c/Å</i>                                                                 | 12.9531(13)                                                                    | 13.0153(9)                                                                     | 27.351(6)                                                                      |
| <i>α°</i>                                                                  | 95.237(2)                                                                      | 107.453(7)                                                                     | 90.00                                                                          |
| <i>β°</i>                                                                  | 97.074(2)                                                                      | 105.230(8)                                                                     | 114.913(9)                                                                     |
| <i>γ°</i>                                                                  | 107.616(2)                                                                     | 97.342(8)                                                                      | 90.00                                                                          |
| <i>V/Å<sup>3</sup></i>                                                     | 1666.6(3)                                                                      | 1545.10(18)                                                                    | 3533.8(15)                                                                     |
| <i>Z</i>                                                                   | 1                                                                              | 2                                                                              | 2                                                                              |
| <i>ρ<sub>c</sub>/g cm<sup>-3</sup></i>                                     | 1.389                                                                          | 1.404                                                                          | 1.421                                                                          |
| <i>μ/mm<sup>-1</sup></i>                                                   | 0.811                                                                          | 1.127                                                                          | 0.768                                                                          |
| <i>F(000)</i>                                                              | 715                                                                            | 666                                                                            | 1558                                                                           |
| <i>Crystal size/mm</i>                                                     | 0.32 0.25 0.20                                                                 | 0.30 0.24 0.21                                                                 | 0.30 0.27 0.22                                                                 |
| <i>Reflections</i>                                                         | 8559 / 5900                                                                    | 7913 / 5406                                                                    | 21559 / 8638                                                                   |
| <i>R<sub>int</sub></i>                                                     | 0.0258                                                                         | 0.0314                                                                         | 0.0947                                                                         |
| <i>T<sub>max</sub>/T<sub>min</sub></i>                                     | 0.8545 / 0.7813                                                                | 0.7977 / 0.7285                                                                | 0.8491 / 0.8022                                                                |
| <i>Data/parameters</i>                                                     | 4044 / 334                                                                     | 5406 / 370                                                                     | 8638 / 465                                                                     |
| <i>S</i>                                                                   | 1.007                                                                          | 1.045                                                                          | 1.022                                                                          |
| <i>R<sub>1</sub><sup>a</sup>, wR<sub>2</sub><sup>b</sup>[I &gt; 2σ(I)]</i> | 0.0484, 0.1017                                                                 | 0.0681, 0.1921                                                                 | 0.0732, 0.1760                                                                 |
| <i>R<sub>1</sub>, wR<sub>2</sub> (all data)</i>                            | 0.0627, 0.1084                                                                 | 0.0877, 0.2082                                                                 | 0.1692, 0.2451                                                                 |
| <i>Δρ<sub>max</sub>/Δρ<sub>min</sub>/eÅ<sup>-3</sup></i>                   | 0.772 / -0.410                                                                 | 2.853 / -0.538                                                                 | 1.237 / -0.587                                                                 |

$$R_1 = \frac{\sum ||F_o| - |F_c||}{\sum |F_o|}, wR_2 = \left\{ \frac{\sum [w(F_o^2 - F_c^2)^2]}{\sum (F_o^2)^2} \right\}^{1/2}$$

Table S2 Selected bond lengths (Å) and bond angles (°) for CPs 1-3.

| Complex 1    |          |              |          |
|--------------|----------|--------------|----------|
| Co(1)-O(6)#1 | 2.061(2) | Co(2)-N(1)   | 2.150(3) |
| Co(1)-O(6)   | 2.061(2) | Co(2)-O(3)#2 | 2.158(2) |
| Co(1)-O(10)  | 2.127(2) | Co(2)-O(9)   | 2.180(2) |

### Supplementary Information

---

|                      |            |                     |            |
|----------------------|------------|---------------------|------------|
| Co(1)-O(10)#1        | 2.127(2)   | Co(2)-O(4)#2        | 2.185(2)   |
| Co(1)-N(3)           | 2.221(3)   | Co(2)-C(33)#2       | 2.494(3)   |
| Co(1)-N(3)#1         | 2.221(3)   | O(3)-Co(2)#2        | 2.158(2)   |
| Co(2)-O(1)           | 2.044(2)   | O(4)-Co(2)#2        | 2.185(2)   |
| Co(2)-N(2)           | 2.087(3)   |                     |            |
| O(6)#1-Co(1)-O(6)    | 180.000(1) | O(1)-Co(2)-N(2)     | 103.83(10) |
| O(6)#1-Co(1)-O(10)   | 89.38(9)   | O(1)-Co(2)-N(1)     | 88.25(9)   |
| O(6)-Co(1)-O(10)     | 90.62(9)   | N(2)-Co(2)-N(1)     | 87.46(11)  |
| O(6)#1-Co(1)-O(10)#1 | 90.62(9)   | O(1)-Co(2)-O(3)#2   | 97.80(9)   |
| O(6)-Co(1)-O(10)#1   | 89.38(9)   | N(2)-Co(2)-O(3)#2   | 158.38(10) |
| O(10)-Co(1)-O(10)#1  | 180        | N(1)-Co(2)-O(3)#2   | 93.32(10)  |
| O(6)#1-Co(1)-N(3)    | 87.30(10)  | O(1)-Co(2)-O(9)     | 92.46(9)   |
| O(6)-Co(1)-N(3)      | 92.70(10)  | N(2)-Co(2)-O(9)     | 87.38(10)  |
| O(10)-Co(1)-N(3)     | 86.77(9)   | N(1)-Co(2)-O(9)     | 174.81(10) |
| O(10)#1-Co(1)-N(3)   | 93.23(9)   | O(3)#2-Co(2)-O(9)   | 91.67(9)   |
| O(6)#1-Co(1)-N(3)#1  | 92.70(10)  | O(1)-Co(2)-O(4)#2   | 158.20(9)  |
| O(6)-Co(1)-N(3)#1    | 87.30(10)  | N(2)-Co(2)-O(4)#2   | 97.87(10)  |
| O(10)-Co(1)-N(3)#1   | 93.23(9)   | N(1)-Co(2)-O(4)#2   | 94.79(10)  |
| O(10)#1-Co(1)-N(3)#1 | 86.77(9)   | O(3)#2-Co(2)-O(4)#2 | 60.51(8)   |
| N(3)-Co(1)-N(3)#1    | 180.00(10) | O(9)-Co(2)-O(4)#2   | 86.44(9)   |
| O(3)#2-Co(2)-C(33)#2 | 30.31(9)   | O(1)-Co(2)-C(33)#2  | 127.86(10) |
| O(9)-Co(2)-C(33)#2   | 86.72(10)  | N(2)-Co(2)-C(33)#2  | 128.15(11) |
| O(4)#2-Co(2)-C(33)#2 | 30.35(9)   | N(1)-Co(2)-C(33)#2  | 96.90(10)  |

---

**Complex 2**

---

|                      |            |                      |            |
|----------------------|------------|----------------------|------------|
| Co(1)-O(15)#1        | 2.067(4)   | Co(2)-N(1)#4         | 2.136(4)   |
| Co(1)-O(6)#2         | 2.087(4)   | Co(2)-O(28)          | 2.153(6)   |
| Co(1)-O(15)          | 2.092(4)   | Co(2)-O(17)#1        | 2.255(4)   |
| Co(1)-O(1)           | 2.102(4)   | O(7)-Co(2)#5         | 2.067(4)   |
| Co(1)-N(2)           | 2.102(5)   | O(15)-Co(2)#1        | 2.062(4)   |
| Co(1)-O(17)          | 2.252(4)   | O(15)-Co(1)#1        | 2.067(4)   |
| Co(2)-O(2)           | 2.046(4)   | O(17)-Co(2)#1        | 2.255(4)   |
| Co(2)-O(15)#1        | 2.062(4)   | N(1)-Co(2)#4         | 2.136(4)   |
| Co(2)-O(7)#3         | 2.067(4)   |                      |            |
| O(15)#1-Co(1)-O(6)#2 | 173.68(14) | N(2)-Co(1)-O(17)     | 86.43(16)  |
| O(15)#1-Co(1)-O(15)  | 80.92(15)  | O(2)-Co(2)-O(15)#1   | 103.04(15) |
| O(6)#2-Co(1)-O(15)   | 93.29(14)  | O(2)-Co(2)-O(7)#3    | 162.59(17) |
| O(15)#1-Co(1)-O(1)   | 97.45(15)  | O(15)#1-Co(2)-O(7)#3 | 92.65(16)  |
| O(6)#2-Co(1)-O(1)    | 80.84(15)  | O(2)-Co(2)-N(1)#4    | 93.82(17)  |

---

### Supplementary Information

|                     |            |                       |            |
|---------------------|------------|-----------------------|------------|
| O(15)-Co(1)-O(1)    | 98.53(15)  | O(15)#1-Co(2)-N(1)#4  | 90.21(16)  |
| O(15)#1-Co(1)-N(2)  | 95.44(17)  | O(7)#3-Co(2)-N(1)#4   | 93.62(17)  |
| O(6)#2-Co(1)-N(2)   | 90.79(17)  | O(2)-Co(2)-O(28)      | 81.9(2)    |
| O(15)-Co(1)-N(2)    | 165.68(17) | O(15)#1-Co(2)-O(28)   | 171.7(2)   |
| O(1)-Co(1)-N(2)     | 95.67(17)  | O(7)#3-Co(2)-O(28)    | 81.7(2)    |
| O(15)#1-Co(1)-O(17) | 99.01(14)  | N(1)#4-Co(2)-O(28)    | 96.1(2)    |
| O(6)#2-Co(1)-O(17)  | 82.40(15)  | O(2)-Co(2)-O(17)#1    | 82.54(15)  |
| O(15)-Co(1)-O(17)   | 80.52(13)  | O(15)#1-Co(2)-O(17)#1 | 81.10(14)  |
| O(1)-Co(1)-O(17)    | 163.13(15) | O(7)#3-Co(2)-O(17)#1  | 92.64(15)  |
| O(28)-Co(2)-O(17)#1 | 93.1(2)    | N(1)#4-Co(2)-O(17)#1  | 169.52(16) |
| <b>Complex 3</b>    |            |                       |            |
| Co(1)-O(2)          | 2.136(4)   | Co(2)-O(6)            | 2.068(4)   |
| Co(1)-O(2)#1        | 2.136(4)   | Co(2)-O(4)            | 2.085(4)   |
| Co(1)-O(1)          | 2.141(4)   | Co(2)-N(3)            | 2.100(4)   |
| Co(1)-O(1)#1        | 2.141(4)   | Co(2)-O(5)#2          | 2.155(4)   |
| Co(1)-N(4)#1        | 2.176(5)   | Co(2)-N(1)            | 2.207(4)   |
| Co(1)-N(4)          | 2.176(5)   | Co(2)-N(2)#3          | 2.214(4)   |
| Co(1)-C(1)          | 2.460(6)   | N(2)-Co(2)#6          | 2.214(4)   |
| Co(1)-C(1)#1        | 2.460(6)   | O(5)-Co(2)#2          | 2.155(4)   |
| O(2)-Co(1)-O(2)#1   | 115.2(2)   | O(2)#1-Co(1)-C(1)#1   | 30.56(17)  |
| O(2)-Co(1)-O(1)     | 62.15(16)  | O(1)-Co(1)-C(1)#1     | 152.1(2)   |
| O(2)#1-Co(1)-O(1)   | 177.34(16) | O(1)#1-Co(1)-C(1)#1   | 31.64(17)  |
| O(2)-Co(1)-O(1)#1   | 177.34(16) | N(4)#1-Co(1)-C(1)#1   | 90.86(19)  |
| O(2)#1-Co(1)-O(1)#1 | 62.15(16)  | N(4)-Co(1)-C(1)#1     | 89.34(19)  |
| O(1)-Co(1)-O(1)#1   | 120.5(2)   | C(1)-Co(1)-C(1)#1     | 176.3(3)   |
| O(2)-Co(1)-N(4)#1   | 92.45(17)  | O(6)-Co(2)-O(4)       | 86.32(15)  |
| O(2)#1-Co(1)-N(4)#1 | 90.97(18)  | O(6)-Co(2)-N(3)       | 94.70(17)  |
| O(1)-Co(1)-N(4)#1   | 88.63(18)  | O(4)-Co(2)-N(3)       | 178.12(17) |
| O(1)#1-Co(1)-N(4)#1 | 88.20(17)  | O(6)-Co(2)-O(5)#2     | 170.73(15) |
| O(2)-Co(1)-N(4)     | 90.97(18)  | O(4)-Co(2)-O(5)#2     | 89.54(14)  |
| O(2)#1-Co(1)-N(4)   | 92.45(17)  | N(3)-Co(2)-O(5)#2     | 89.23(17)  |
| O(1)-Co(1)-N(4)     | 88.20(17)  | O(6)-Co(2)-N(1)       | 92.52(16)  |
| O(1)#1-Co(1)-N(4)   | 88.63(18)  | O(4)-Co(2)-N(1)       | 93.64(14)  |
| N(4)#1-Co(1)-N(4)   | 173.6(3)   | N(3)-Co(2)-N(1)       | 87.90(16)  |
| O(2)-Co(1)-C(1)     | 30.56(17)  | O(5)#2-Co(2)-N(1)     | 96.01(16)  |
| O(2)#1-Co(1)-C(1)   | 145.7(2)   | O(6)-Co(2)-N(2)#3     | 87.86(16)  |
| O(1)-Co(1)-C(1)     | 31.64(17)  | O(4)-Co(2)-N(2)#3     | 89.65(16)  |
| O(1)#1-Co(1)-C(1)   | 152.1(2)   | N(3)-Co(2)-N(2)#3     | 88.81(17)  |

## Supplementary Information

|                   |           |                     |            |
|-------------------|-----------|---------------------|------------|
| N(4)#1-Co(1)-C(1) | 89.34(19) | O(5)#2-Co(2)-N(2)#3 | 83.83(16)  |
| N(4)-Co(1)-C(1)   | 90.86(19) | N(1)-Co(2)-N(2)#3   | 176.71(17) |
| O(2)-Co(1)-C(1)#1 | 145.7(2)  |                     |            |

Symmetry transformations used to generate equivalent atoms:

**Compound 1:** #1 =  $-x + 1, -y, -z + 2$ ; #2 =  $-x, -y + 1, -z + 1$ .

**Compound 2:** #1 =  $-x, -y, -z + 1$ ; #2 =  $-x, -y, -z$ ; #3 =  $x, y, z + 1$ ; #4 =  $-x + 1, -y + 1, -z + 1$ ; #5 =  $x, y, z - 1$ .

**Compound 3:** #1 =  $-x + 2, y, -z + 1/2$ ; #2 =  $-x, -y + 1, -z$ ; #3 =  $x, -y + 1, z - 1/2$ ; #4 =  $-x + 1, -y, -z$ ; #5 =  $-x + 2, -y + 2, -z$ ; #6 =  $x, -y + 1, z + 1/2$ .

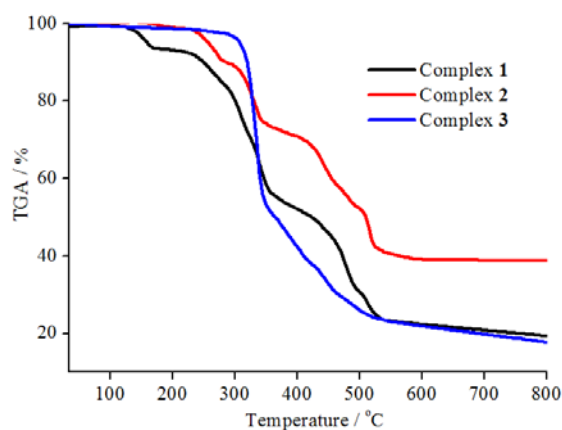

Figure S1. The TG analyses of the compound 1 – 3.

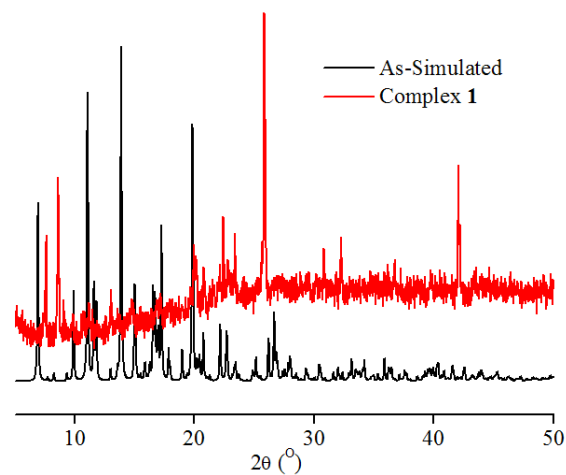

Figure S2. The Powder X-ray diffraction (PXRD) patterns of 1.

### Supplementary Information

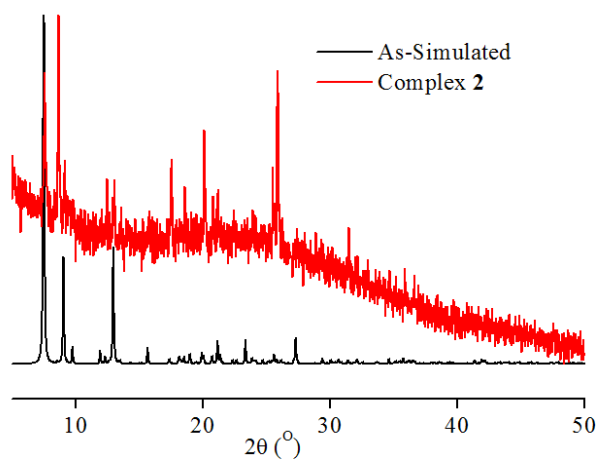

Figure S3. The Powder X-ray diffraction (PXRD) patterns of **2**.

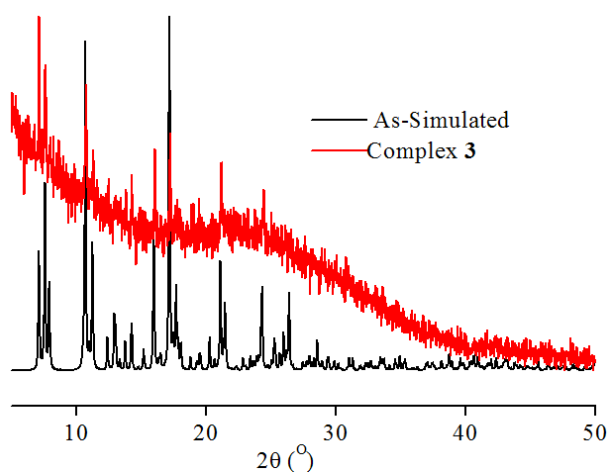

Figure S4. The Powder X-ray diffraction (PXRD) patterns of **3**.

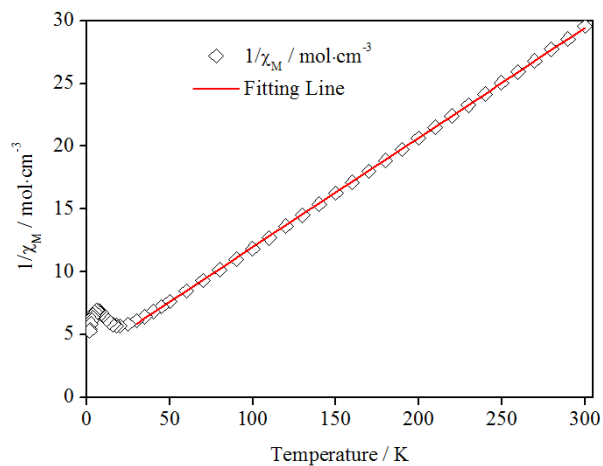

Figure S5. Temperature dependence of  $\chi_M^{-1}$  for **1** (open squares and red line represent experimental data and fits).  $C = 11.99 \text{ cm}^3 \text{ K mol}^{-1}$ .

### Supplementary Information

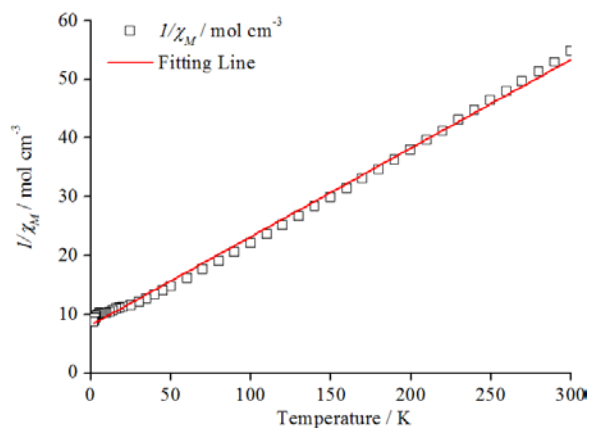

Figure S6. Temperature dependence of  $\chi_M^{-1}$  for **2** (open squares and red line represent experimental data and fits).  $C = 6.63 \text{ cm}^3 \text{ K mol}^{-1}$ .

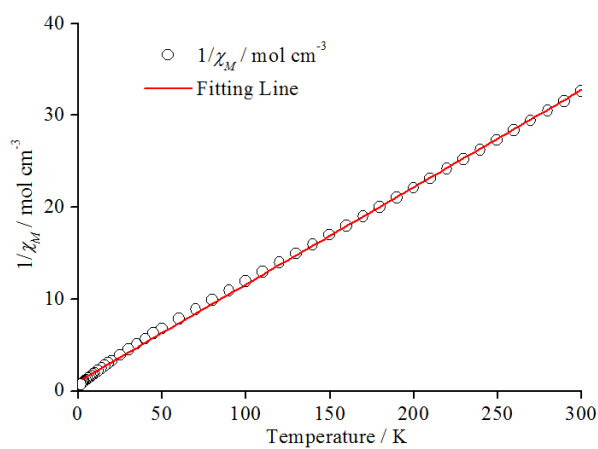

Figure S7. Temperature dependence of  $\chi_M^{-1}$  for **3** (open circles and red line represent experimental data and fits).  $C = 9.45 \text{ cm}^3 \text{ K mol}^{-1}$ .
